# Supplementary material for: Plasmodium vivax-like genome sequences shed new insights into Plasmodium vivax biology and evolution
Source: PubMed Central journal article supplement (PMC6130868; doi:10.1371/journal.pbio.2006035), 2018-08-24

Reference Allele Frequency densities

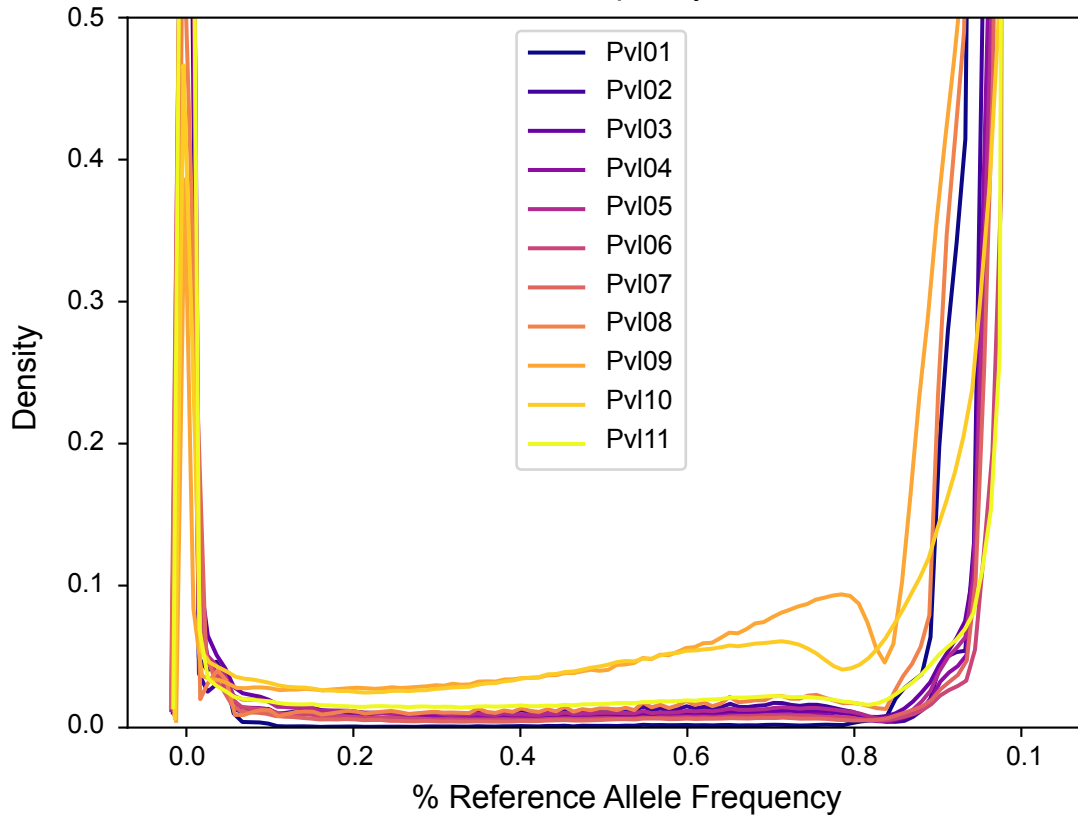

Supplement: pbio.2006035.s008.pdf [file pbio.2006035.s008.pdf]
