# Supplementary material for: Plasmodium vivax-like genome sequences shed new insights into Plasmodium vivax biology and evolution
Source: PubMed Central journal article supplement (PMC6130868; doi:10.1371/journal.pbio.2006035), 2018-08-24
Supplement: pbio.2006035.s009.pdf [file pbio.2006035.s009.pdf]

## Chromosome 1

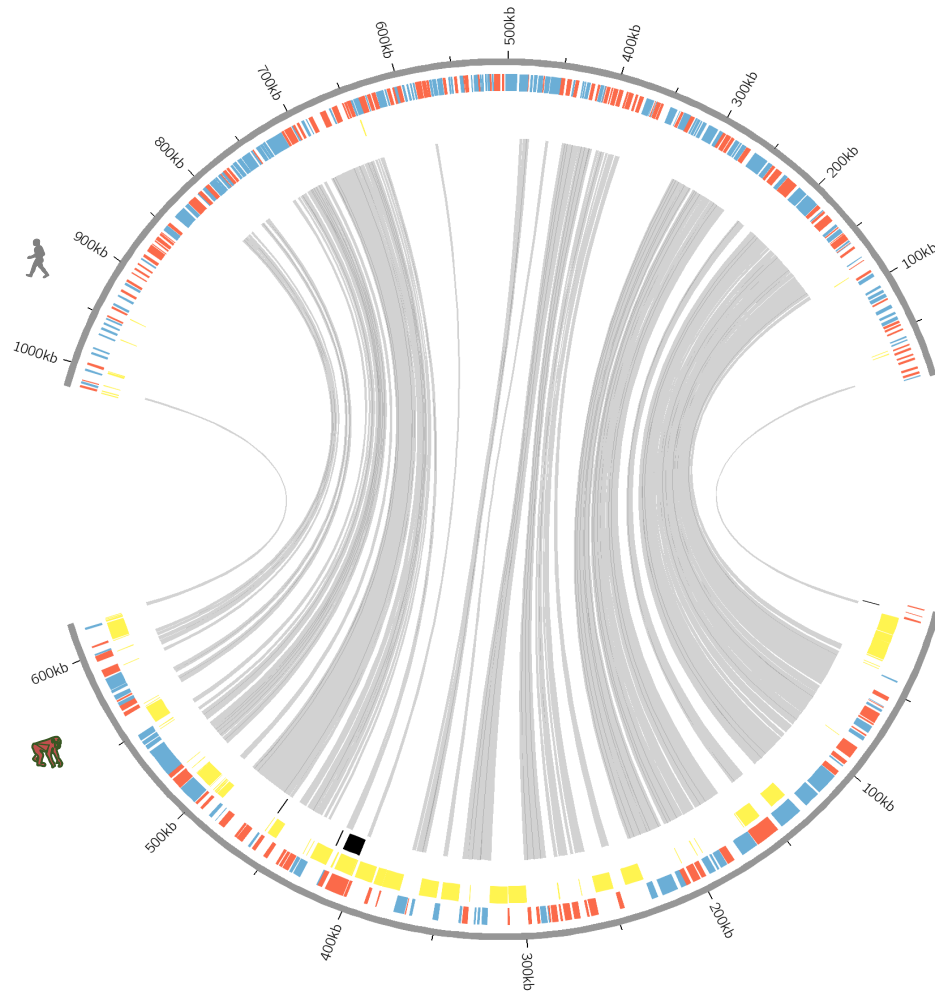

## Chromosome 2

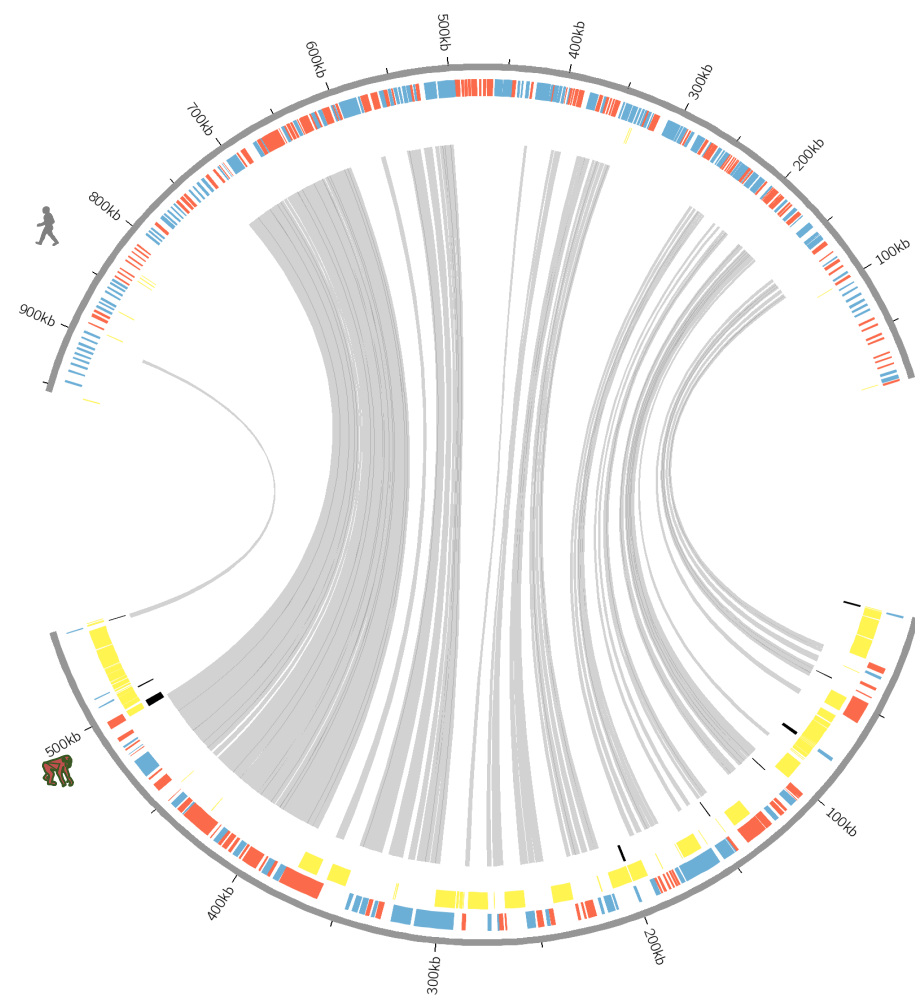

 *P. vivax*-like *Pvl01*  *P. vivax* *PvP01*

### Chromosome 3

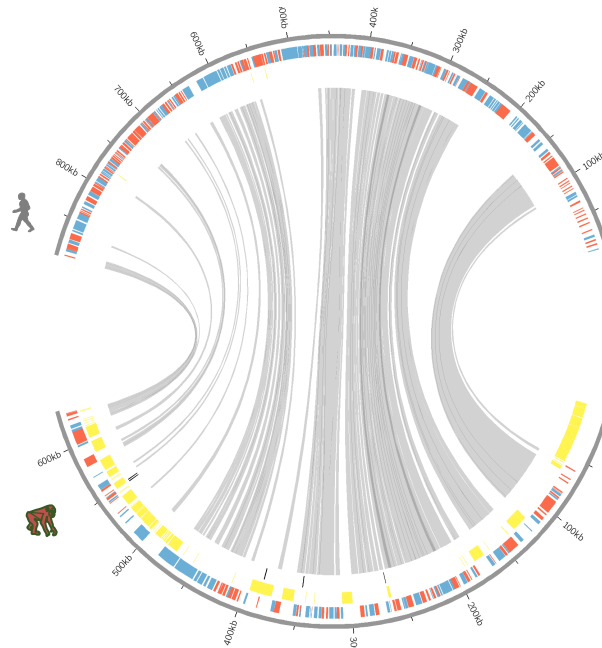

### Chromosome 4

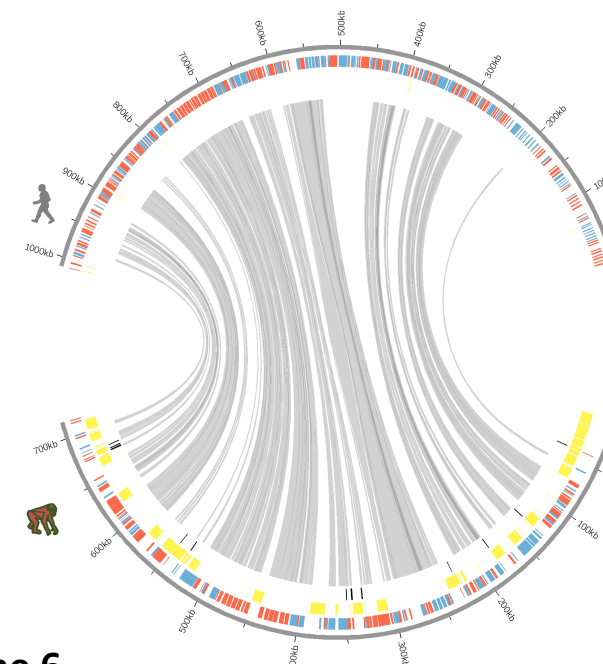

### Chromosome 5

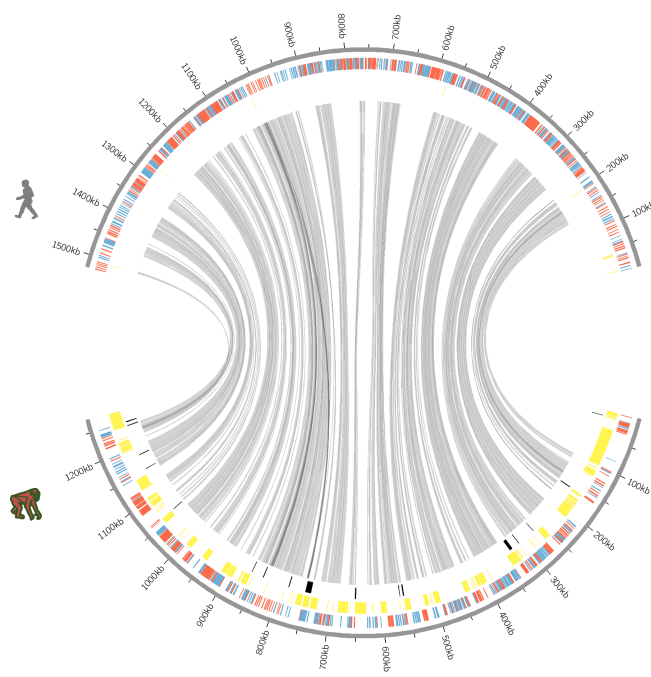

### Chromosome 6

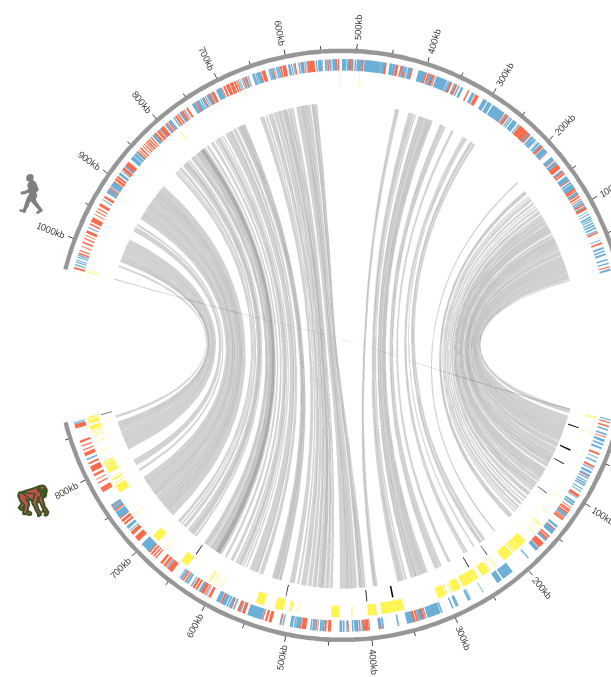

 *P. vivax*-like *Pvl01*

 *P. vivax* *PvP01*

### Chromosome 7

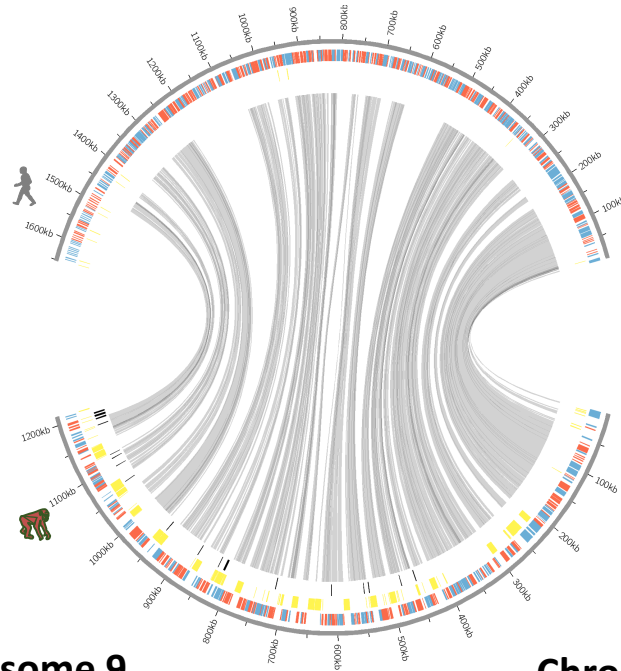

### Chromosome 8

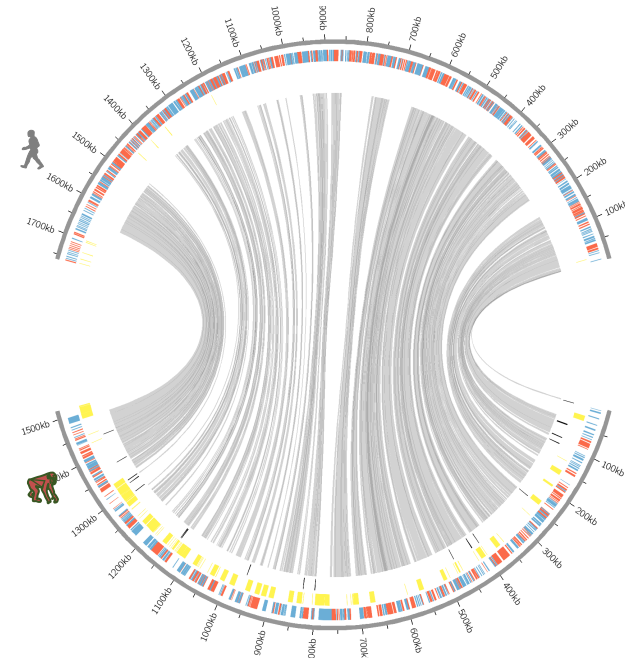

### Chromosome 9

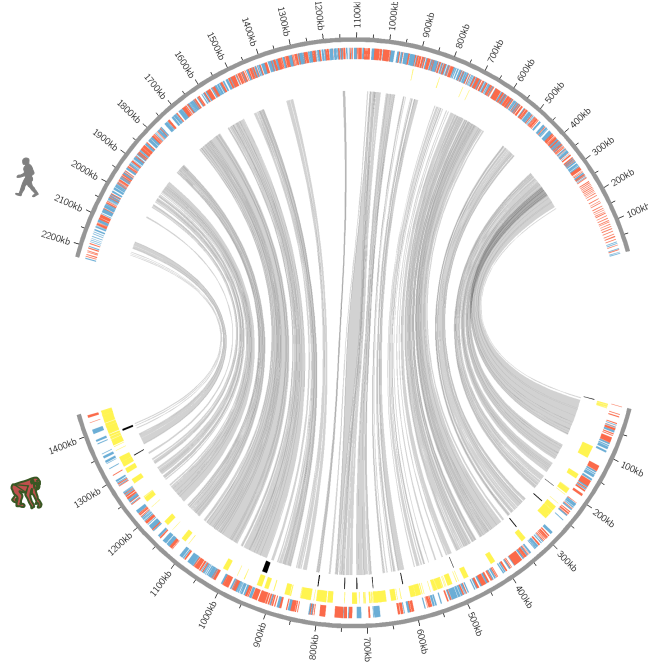

### Chromosome 10

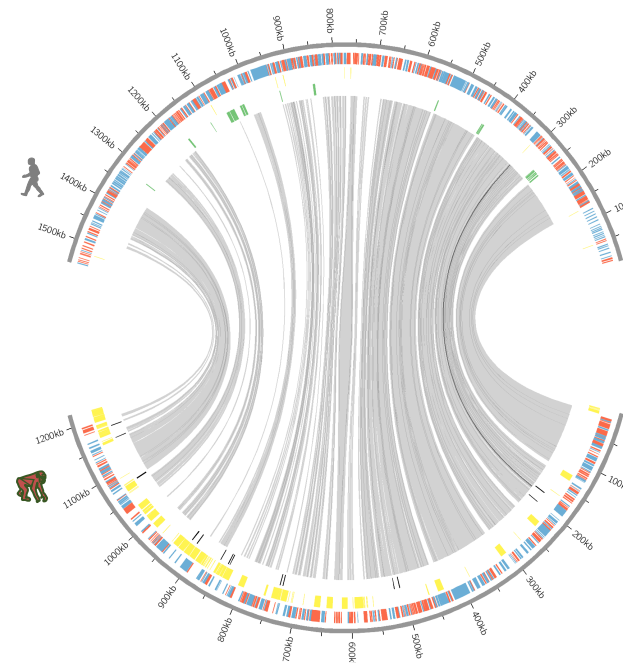

 *P. vivax*-like *Pvl01*

 *P. vivax* *PvP01*

### Chromosome 11

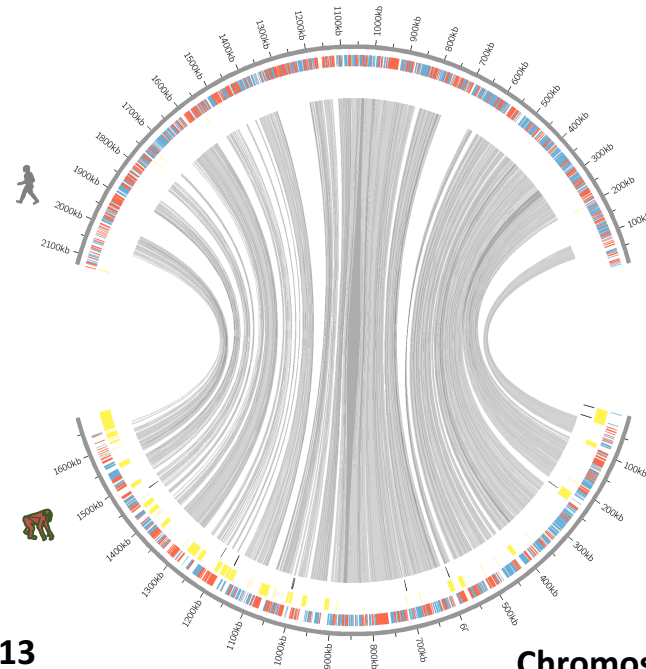

### Chromosome 12

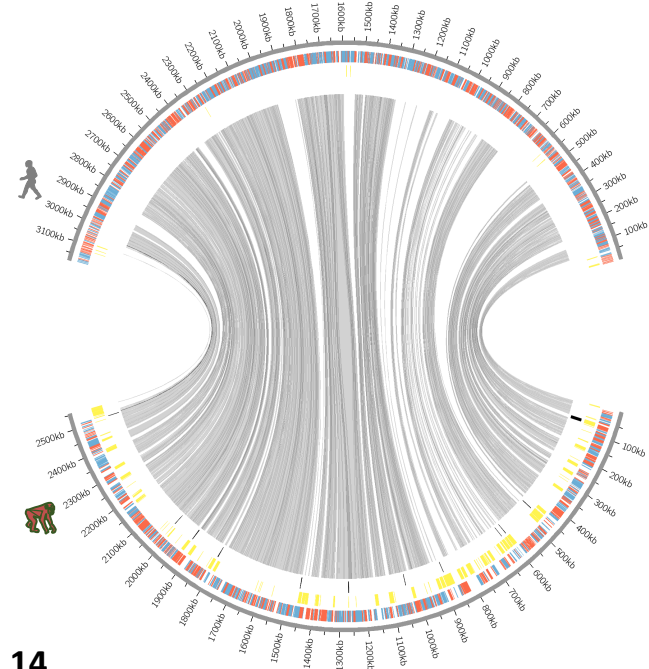

### Chromosome 13

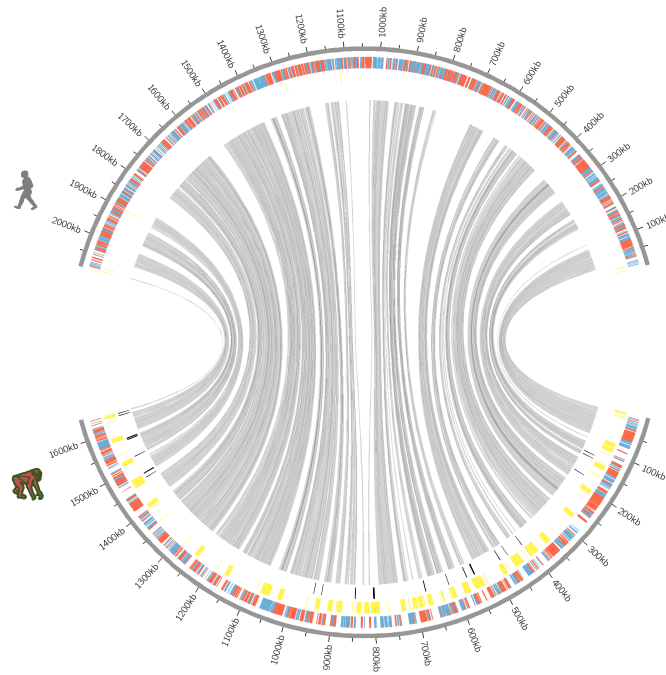

### Chromosome 14

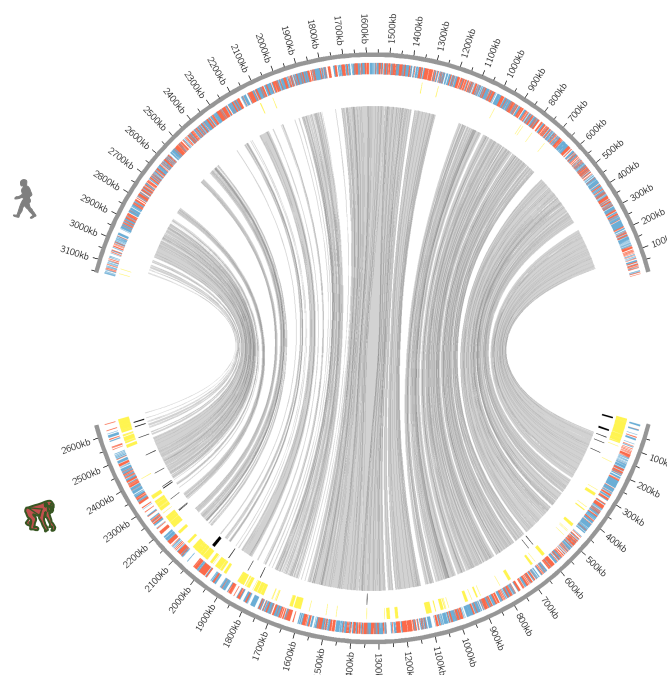

 *P. vivax*-like *Pvl01*

 *P. vivax* *PvP01*
