# Supplementary material for: Plasmodium vivax-like genome sequences shed new insights into Plasmodium vivax biology and evolution
Source: PubMed Central journal article supplement (PMC6130868; doi:10.1371/journal.pbio.2006035), 2018-08-24
Supplement: pbio.2006035.s010.pdf [file pbio.2006035.s010.pdf]

# Chromosome 1

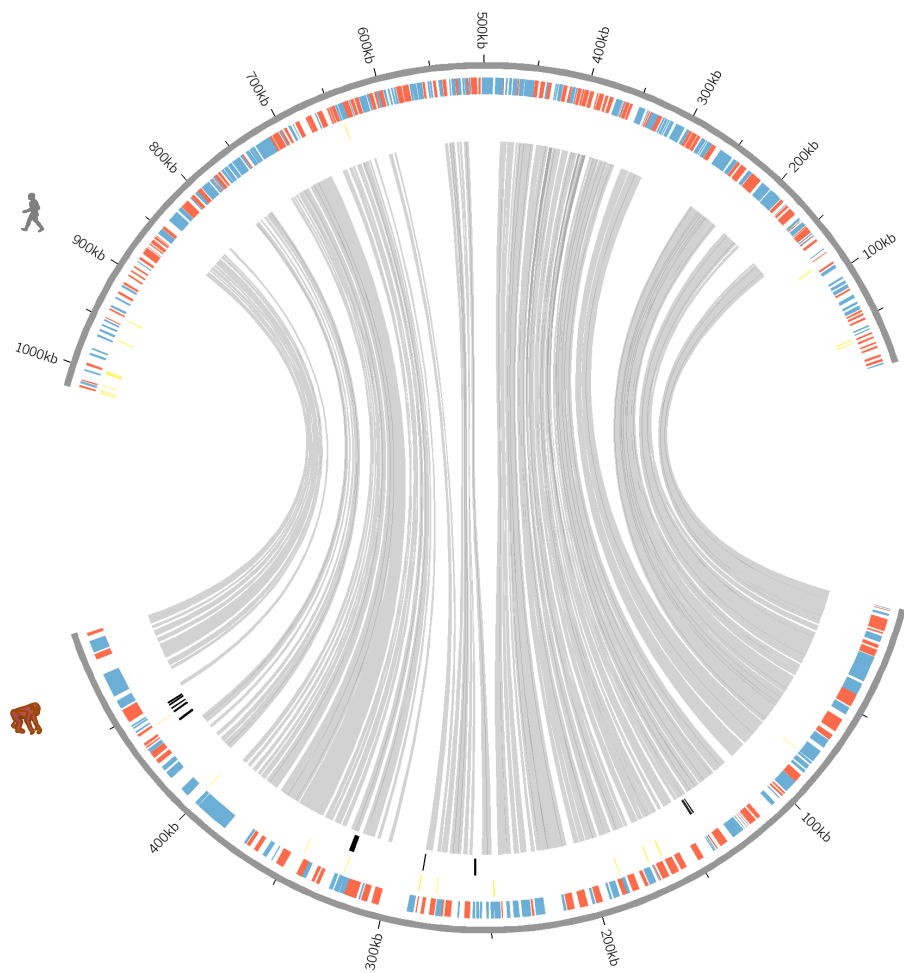

# Chromosome 2

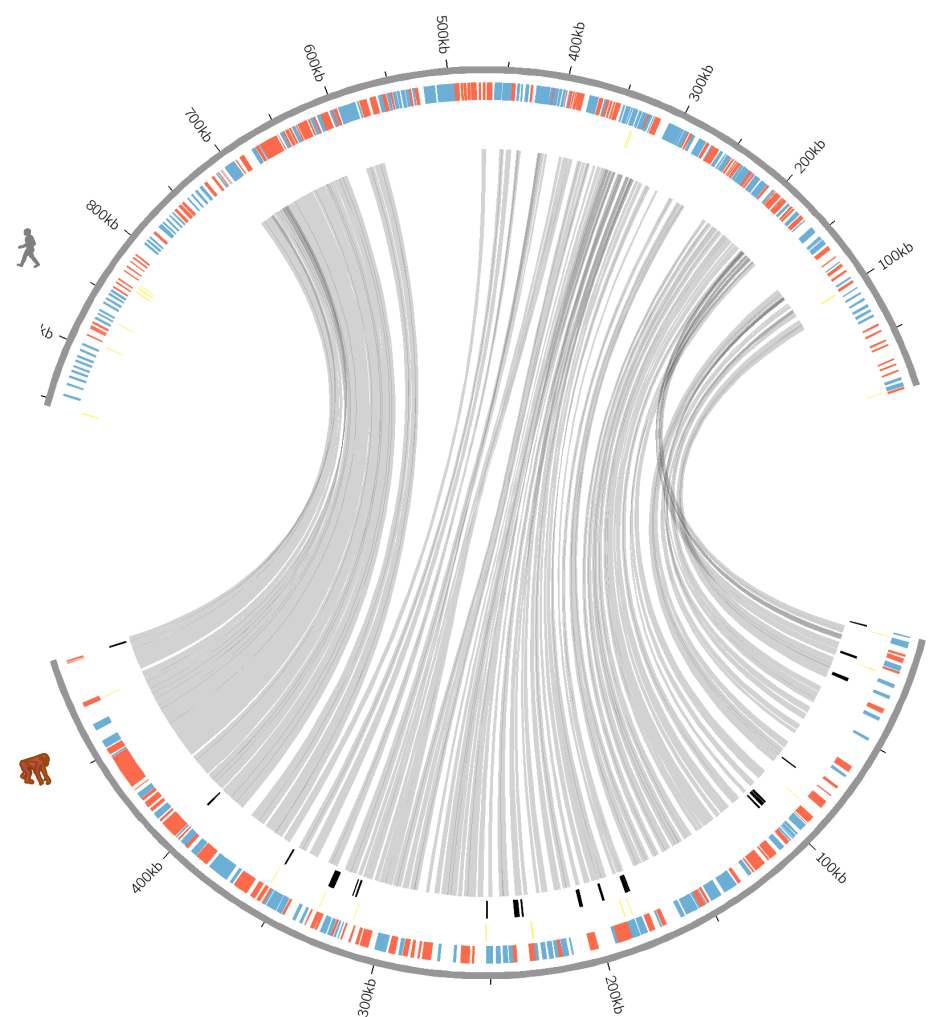

### Chromosome 3

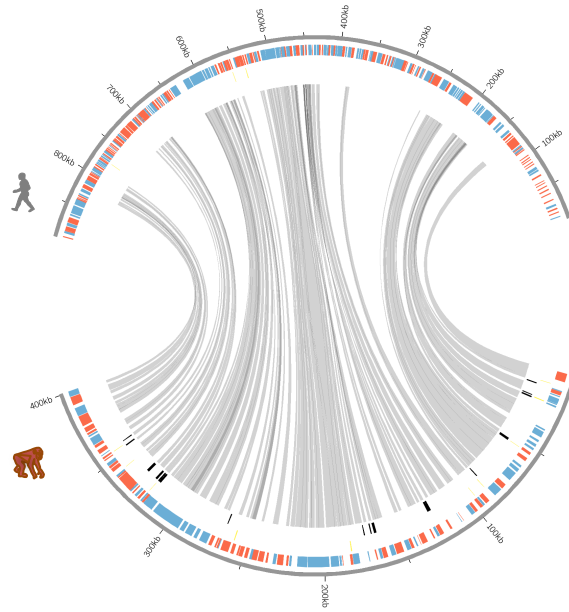

### Chromosome 4

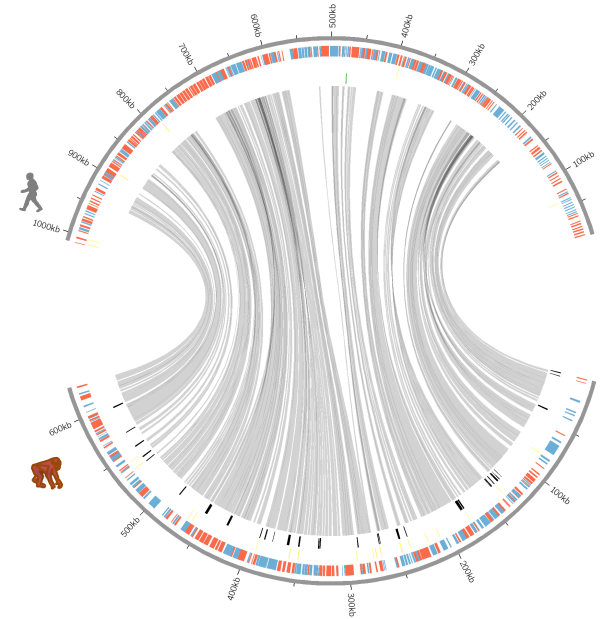

### Chromosome 5

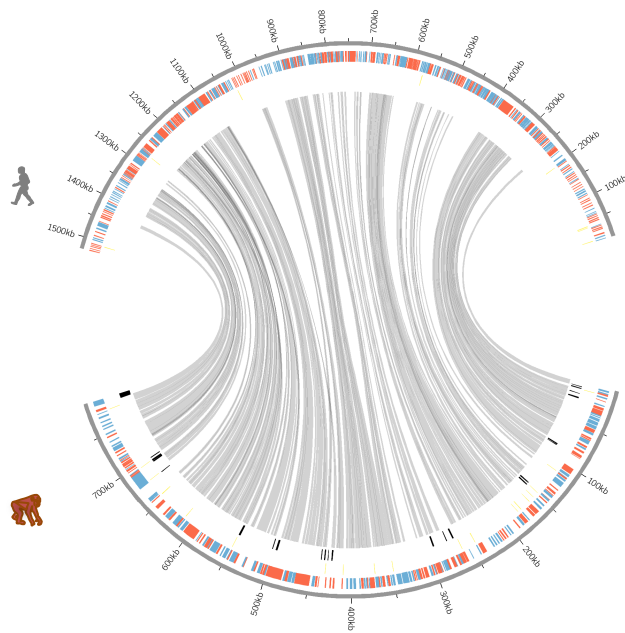

### Chromosome 6

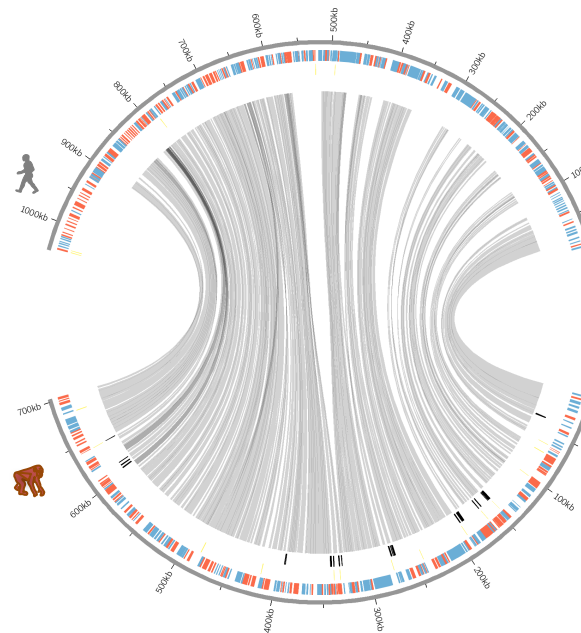

 *P. vivax*-like *Pvl06*

 *P. vivax* *PvP01*

## Chromosome 7

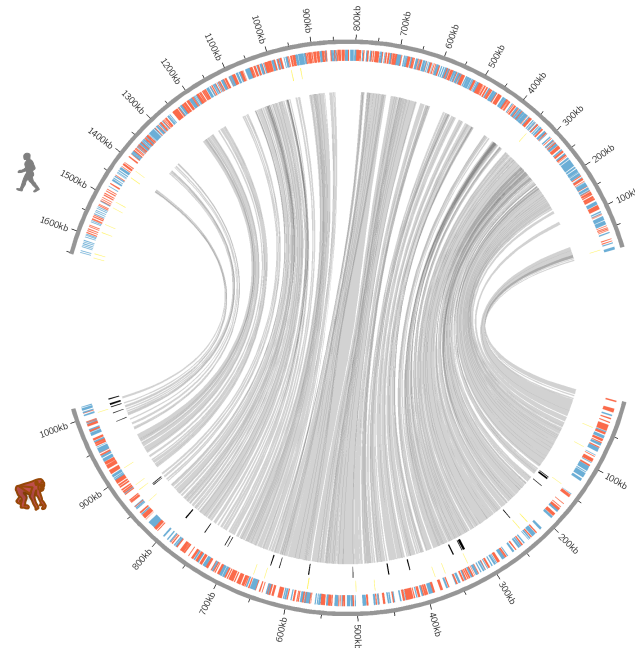

## Chromosome 8

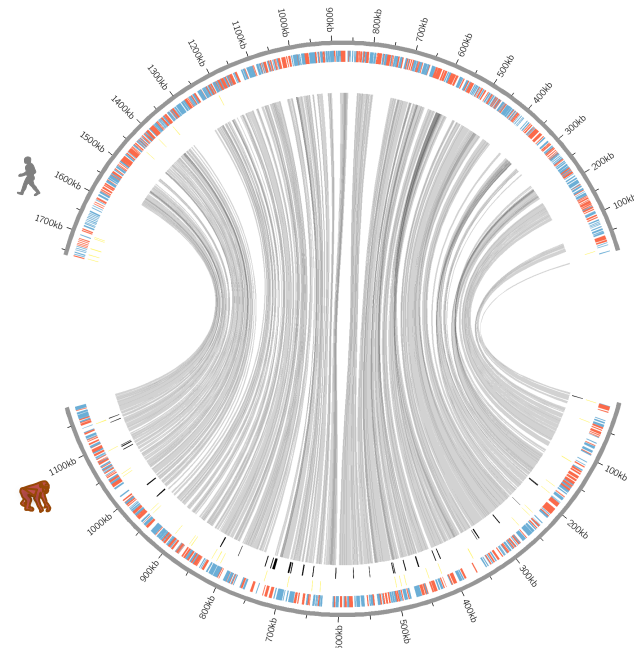

## Chromosome 9

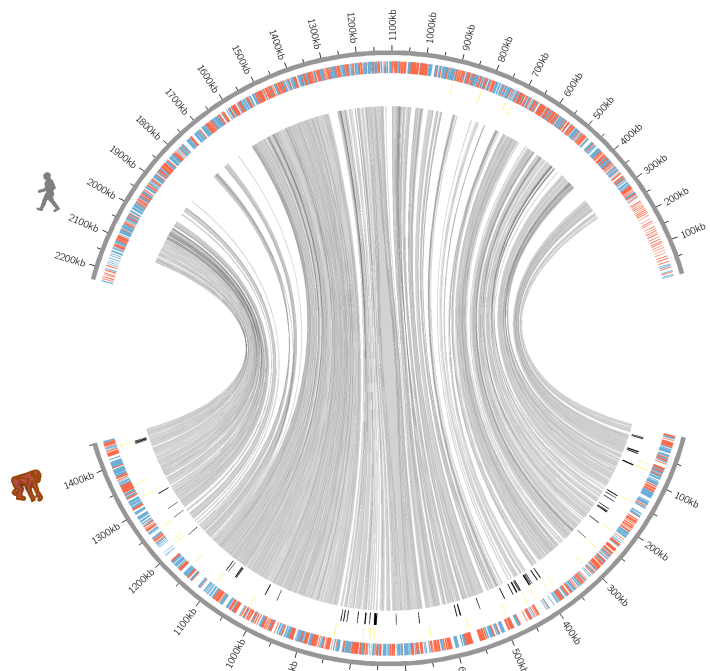

## Chromosome 10

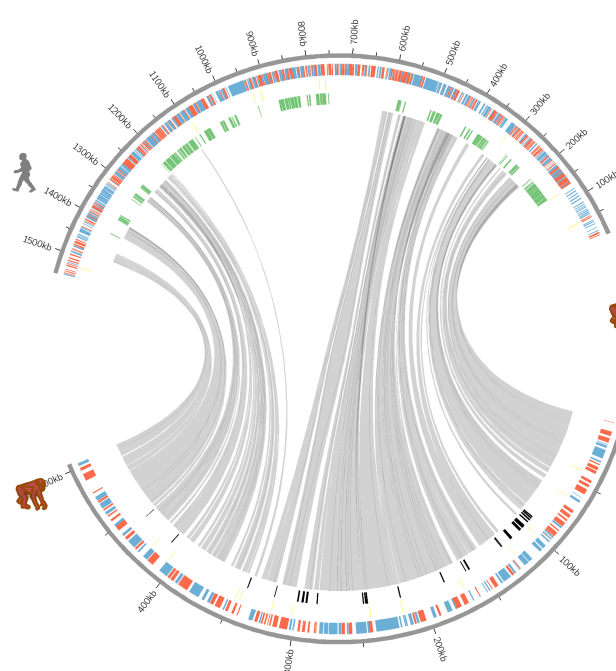

 *P. vivax*-like *Pvl06*

 *P. vivax* *PvP01*

## Chromosome 11

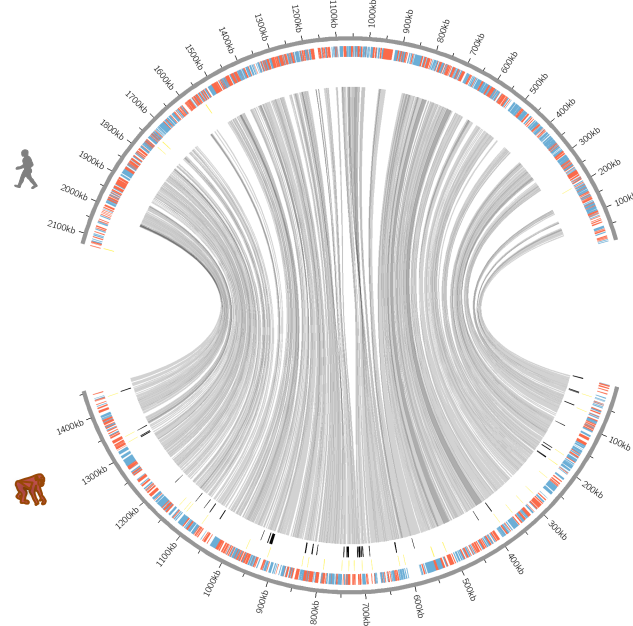

## Chromosome 12

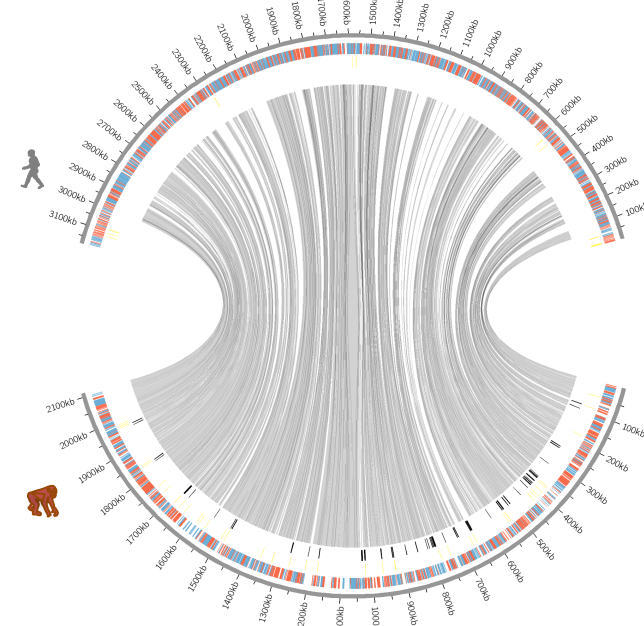

## Chromosome 13

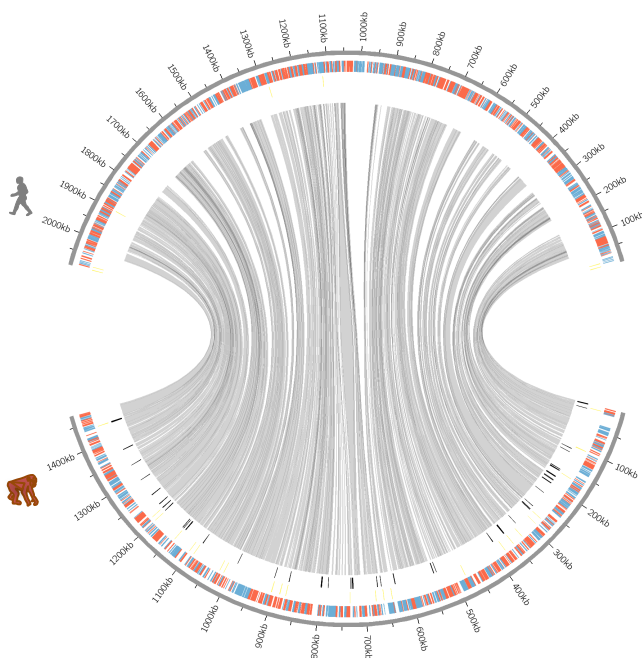

## Chromosome 14

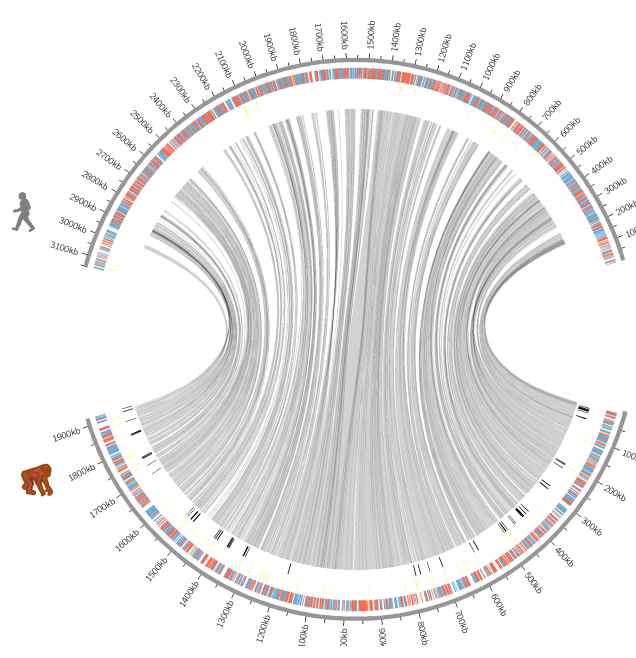

 *P. vivax*-like *Pvl06*

 *P. vivax* *PvP01*
