# Supplementary material for: Plasmodium vivax-like genome sequences shed new insights into Plasmodium vivax biology and evolution
Source: PubMed Central journal article supplement (PMC6130868; doi:10.1371/journal.pbio.2006035), 2018-08-24
Supplement: pbio.2006035.s011.pdf [file pbio.2006035.s011.pdf]

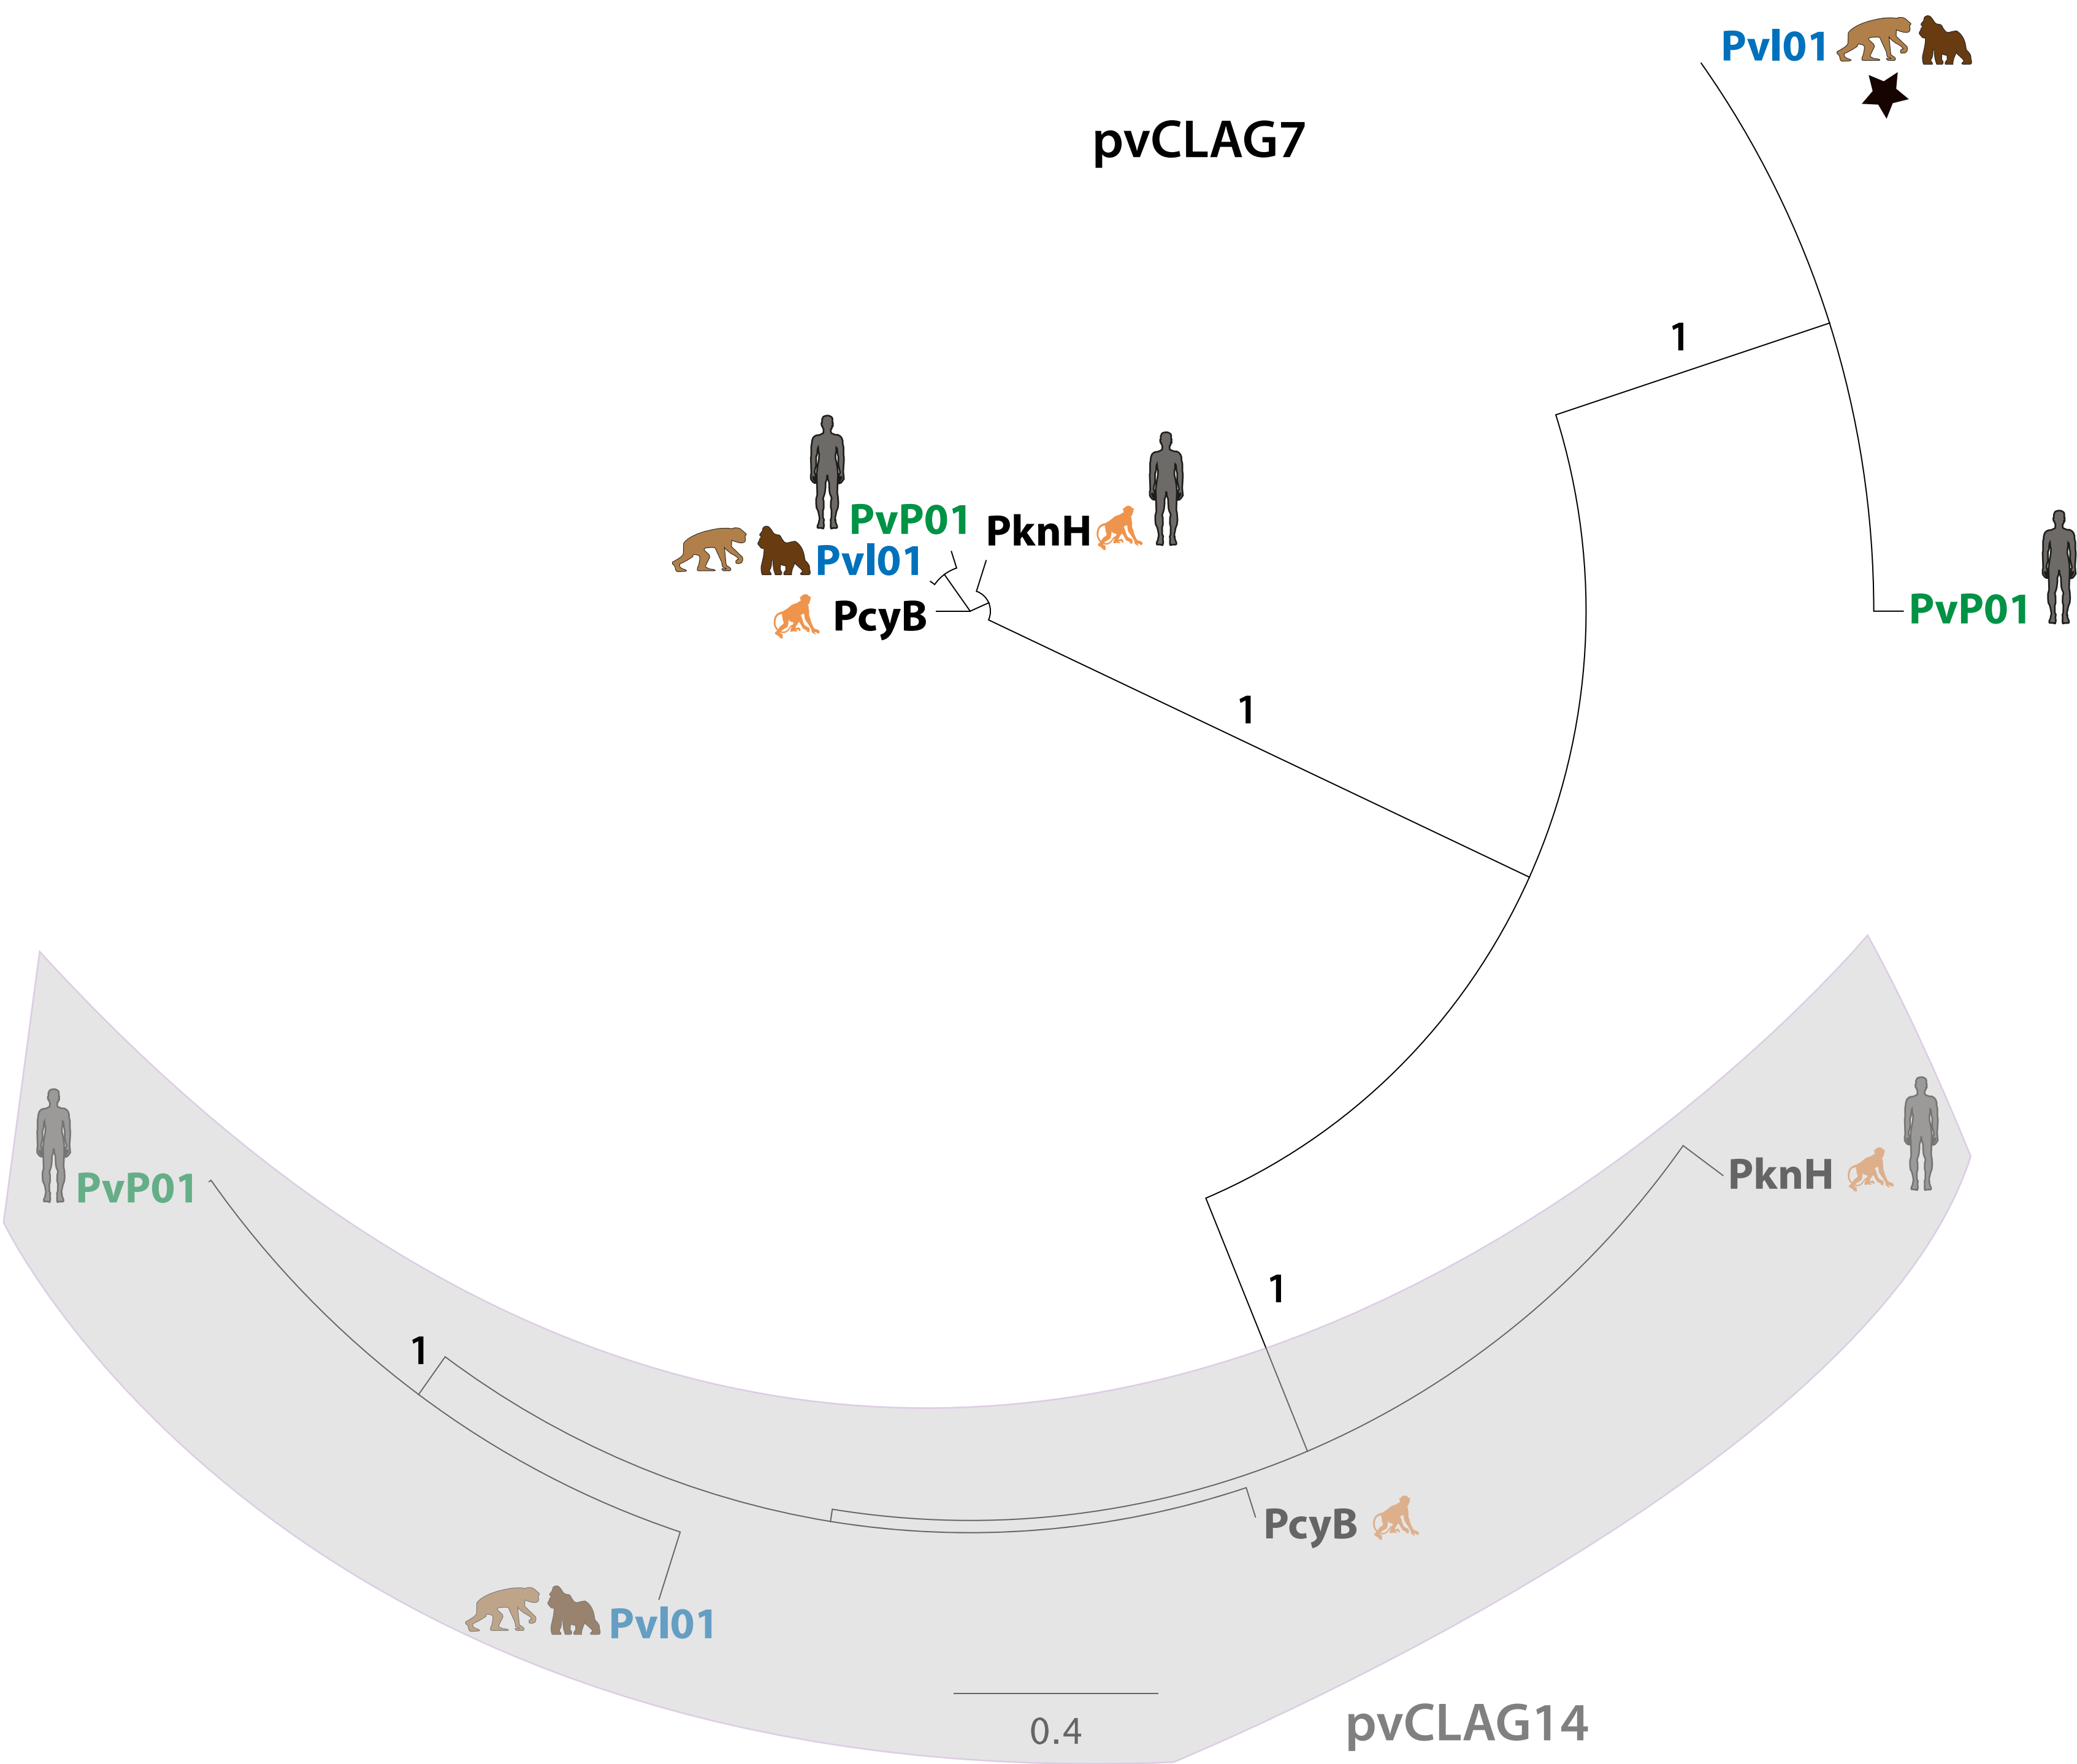

Pvl01

pvCLAG7

PvP01  
 PknH  
 Pvl01  
 PcyB

PvP01

PvP01

PknH

PcyB

Pvl01

0.4

pvCLAG14
