# Supplementary material for: Plasmodium vivax-like genome sequences shed new insights into Plasmodium vivax biology and evolution
Source: PubMed Central journal article supplement (PMC6130868; doi:10.1371/journal.pbio.2006035), 2018-08-24
Supplement: pbio.2006035.s014.pdf [file pbio.2006035.s014.pdf]

100 SNPs

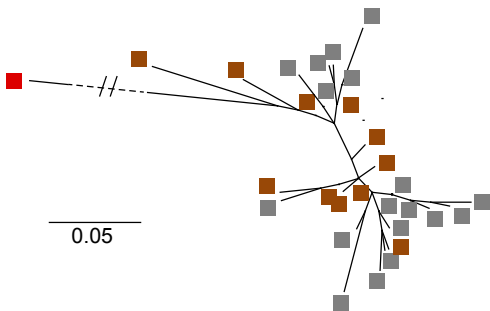

200 SNPs

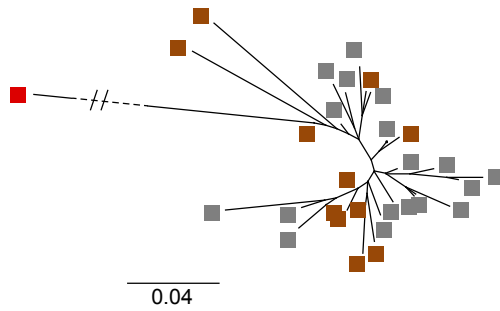

300 SNPs

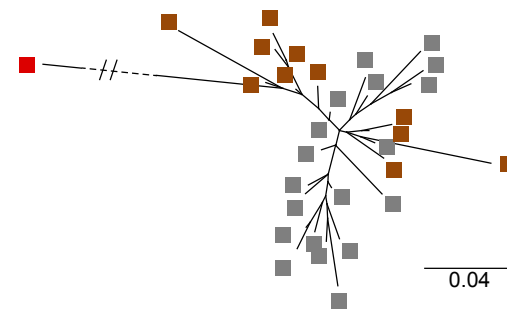

400 SNPs

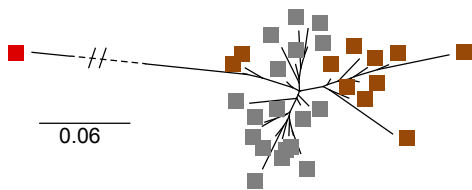

500 SNPs

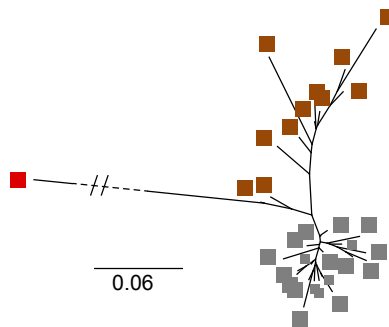

600 SNPs

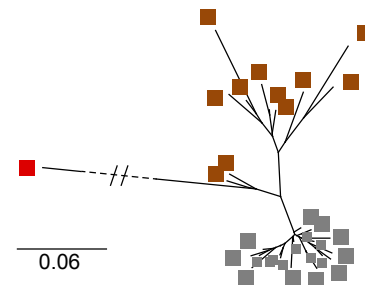

800 SNPs

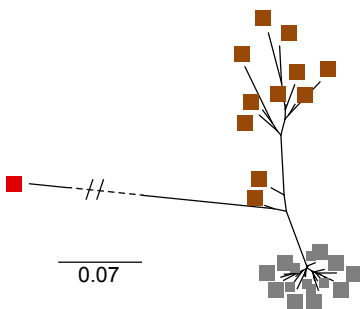

1,000 SNPs

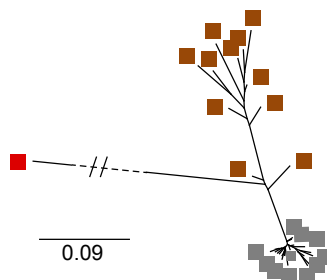

5,000 SNPs

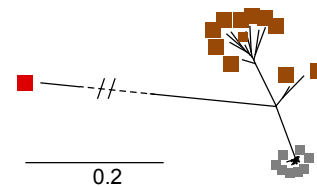*P. cynomolgi* ■*P. vivax-like* ■*P. vivax* ■
