# Supplementary material for: Plasmodium vivax-like genome sequences shed new insights into Plasmodium vivax biology and evolution
Source: PLoS Biol. 2018 Aug 24;16(8):e2006035. doi: 10.1371/journal.pbio.2006035 (PMC6130868; doi:10.1371/journal.pbio.2006035)
Supplement: S7 Table — The list of the 10 orthologous genes showing a signature of selection in both P. vivax PvP01 and P. falciparum 3D7 is indicated, based on the branch-site tests of positive selection. The branch-site tests of selection for PF3D7 genes were performed by Otto and colleagues [13] (see Suppl. Table 4 from Otto and colleagues [13]); PF3D7 orthologous genes to PvP01 genes were identified using the PlasmoDB database (http://plasmodb.org/plasmo/). dN/dS = 999 when no synonymous difference is observed in the alignment of the gene considered and thus the ratio is estimated to be infinite. (XLSX) [file pbio.2006035.s007.xlsx]

## Sheet: S7 Table Selection Pv-Pf
Supplementary Table 7 - P. vivax and P. falciparum genome-wide signatures of selection.
The list of the 10 orthologous genes showing a signature of selection in both P. vivax and P. falciparum is indicated, based on the branch-site tests of positive selection.
The branch-site tests of selection for PF3D7 genes were performed by Otto et al. (2018; doi: 10.1038/s41564-018-0162-2; see Suppl. Table 4 from Otto et al. 2018); PF3D7 orthologues to PVP01 genes were identified using the PlasmoDB database (http://plasmodb.org/plasmo/)
dN/dS = 999 when no synonymous differences is observed in the alignment of the gene considered and thus the ratio is estimated to be infinite.
						PVP01		PF3D7
PVP01 Gene ID	PF3D7 Gene ID	Protein product	Gene name	PVP01 Gene length (bp)	PVP01 Alignmnet length (bp)	dN/dS	dN/dS P-value	dN/dS	dN/dS P-value
PVP01_0310500	PF3D7_0411200	conserved Plasmodium protein, unknown function CDS		3216	1302	0.0001	0.012335919	0.2346	0.000534382
PVP01_0407800	PF3D7_0217200	conserved Plasmodium protein, unknown function CDS		4014	2493	0.2549	2.2473E-15	999	0.0263414
PVP01_0526800	PF3D7_0417400	conserved Plasmodium protein, unknown function CDS		16341	4065	0.3919	6.21644E-07	0.4454	0.000169797
PVP01_0618100	PF3D7_1033000	conserved Plasmodium protein, unknown function CDS		1539	1401	999	0.000465467	0.1111	0.0242157
PVP01_0727300	PF3D7_0928800	serine/threonine protein kinase, putative CDS		1806	1299	0.0714	0.03800197	0.183	1.48e-06
PVP01_0819800	PF3D7_0320400	oocyst capsule protein, putative CDS	Cap380	10203	8412	0.0001	0.041706682	0.6788	0.0460802
PVP01_1020700	PF3D7_0513200	conserved Plasmodium protein, unknown function CDS		7038	4593	0.2153	2.23842E-13	0.1373	0.0325385
PVP01_1135800	PF3D7_0613300	rhoptry protein ROP14, putative CDS	ROP14	3267	2115	0.2031	3.3483E-08	0.2517	0.0109608
PVP01_1225500	PF3D7_1329000	DNA-directed RNA polymerase III subunit RPC1,putative CDS		5820	4560	0.4666	0.000022573	0.0001	0.0214855
PVP01_1305600	PF3D7_1206500	Tat binding protein 1(TBP-1)-interactingprotein, putative CDS		1725	996	0.0423	0.00189581	0.4043	3.34e-07
